# Supplementary material for: Whole genome sequence association analysis of fasting glucose and fasting insulin levels in diverse cohorts from the NHLBI TOPMed program
Source: PubMed Central journal article supplement (PMC9334637; doi:10.1038/s42003-022-03702-4), 2022-07-28
Supplement: 42003_2022_3702_MOESM2_ESM.pdf [file 42003_2022_3702_MOESM2_ESM.pdf]

## Description of Additional Supplementary Files

**File name:** Supplementary Data 1

**Description:** 95% Credible Sets for all reported Loci.

**File name:** Supplementary Data 2

**Description:** 99% Credible Sets for Reported Loci from Pooled Analysis with <50 Variants.

**File name:** Supplementary Data 3

**Description:** References for previous identification of variants in this study.

**File name:** Supplementary Data 4

**Description:** Reference for previous identification of gene regions in this study.

**File name:** Supplementary Data 5

**Description:** Lookups in related traits of identified loci in TOPMed projects.

**File name:** Supplementary Data 6

**Description:** Significant Results of genome wide Fasting Glucose gene-centric rare variant aggregate tests.

**File name:** Supplementary Data 7

**Description:** Significant Results of genome wide Fasting Glucose genetic-regions (sliding window) rare variant aggregate tests.

**File name:** Supplementary Data 8

**Description:** Significant Results of genome wide log Fasting Insulin gene-centric rare variant aggregate tests.

**File name:** Supplementary Data 9

**Description:** Significant Results of genome wide log Fasting Insulin genetic-regions (sliding window) rare variant aggregate tests.
